# Supplementary material for: GLP-2 receptor signaling controls circulating bile acid levels but not glucose homeostasis in Gcgr−/− mice and is dispensable for the metabolic benefits ensuing after vertical sleeve gastrectomy
Source: PubMed Central journal article supplement — Mol Metab. 2018 Jun 9;16:45–54. doi: 10.1016/j.molmet.2018.06.006 (PMC6157461; doi:10.1016/j.molmet.2018.06.006), 2018-06-09
Supplement: mmc1.pdf [file mmc1.pdf]

Supplementary Figure 1

PLASMA

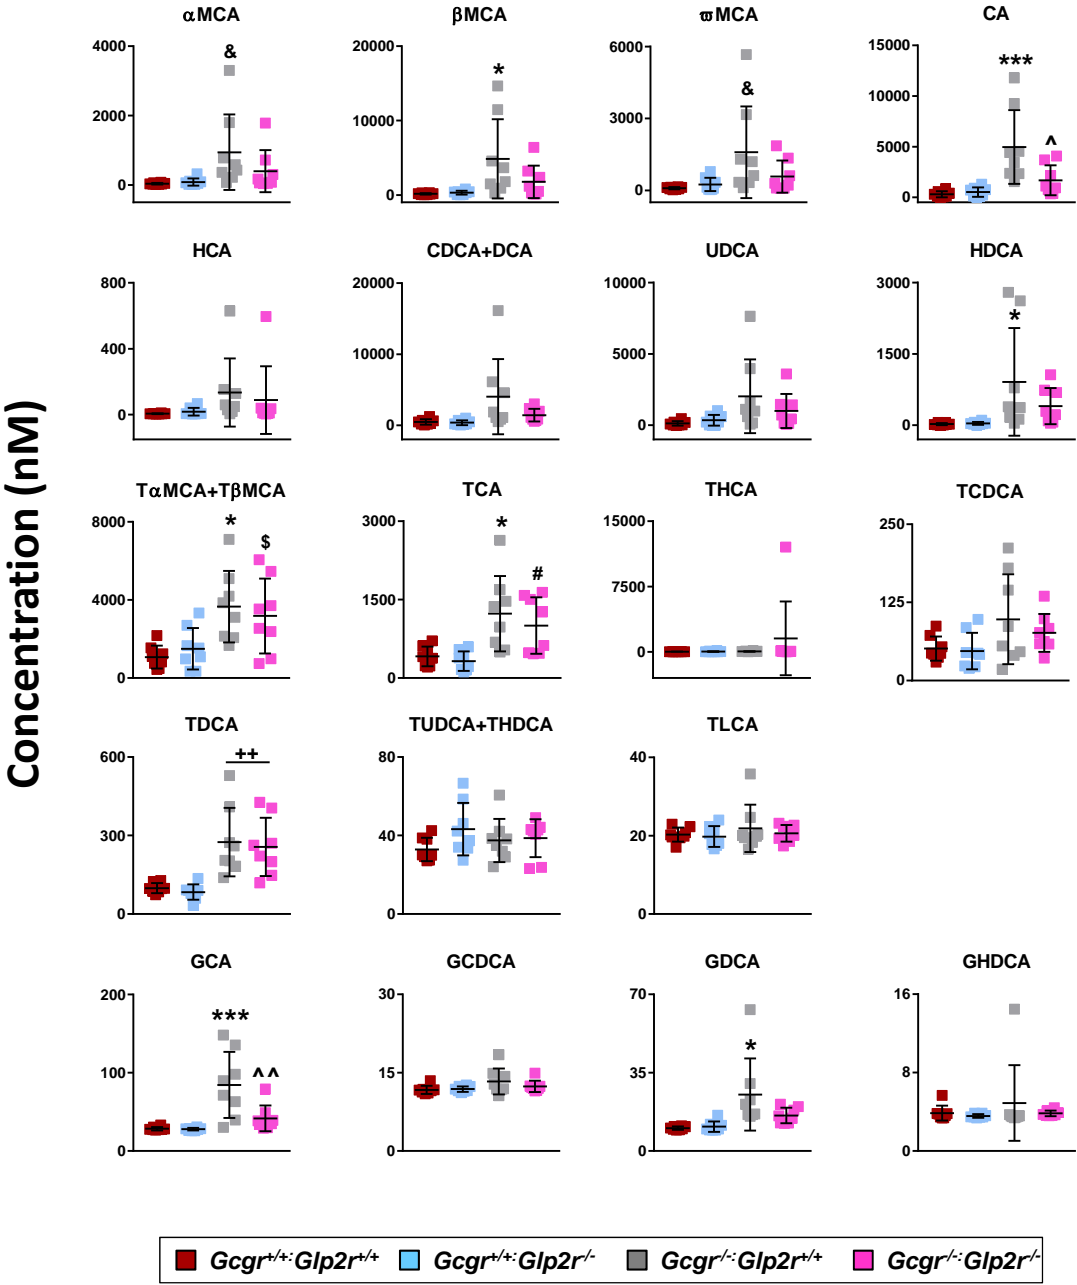



Supplementary Figure 3

ILEUM

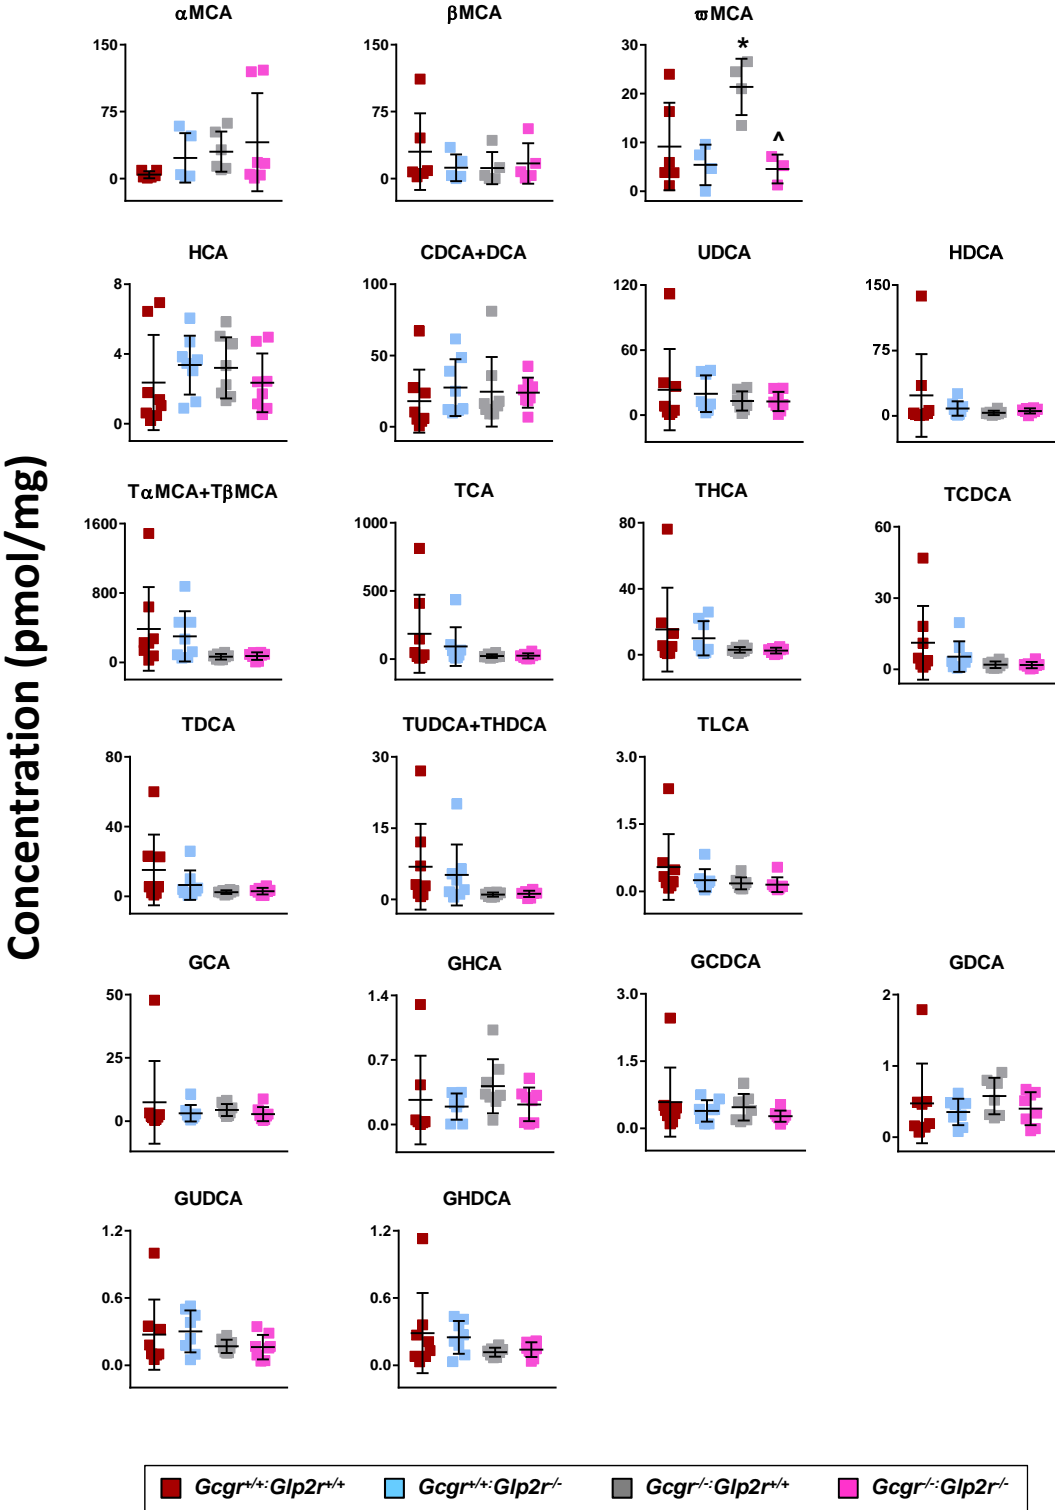

# Supplementary Figure 4

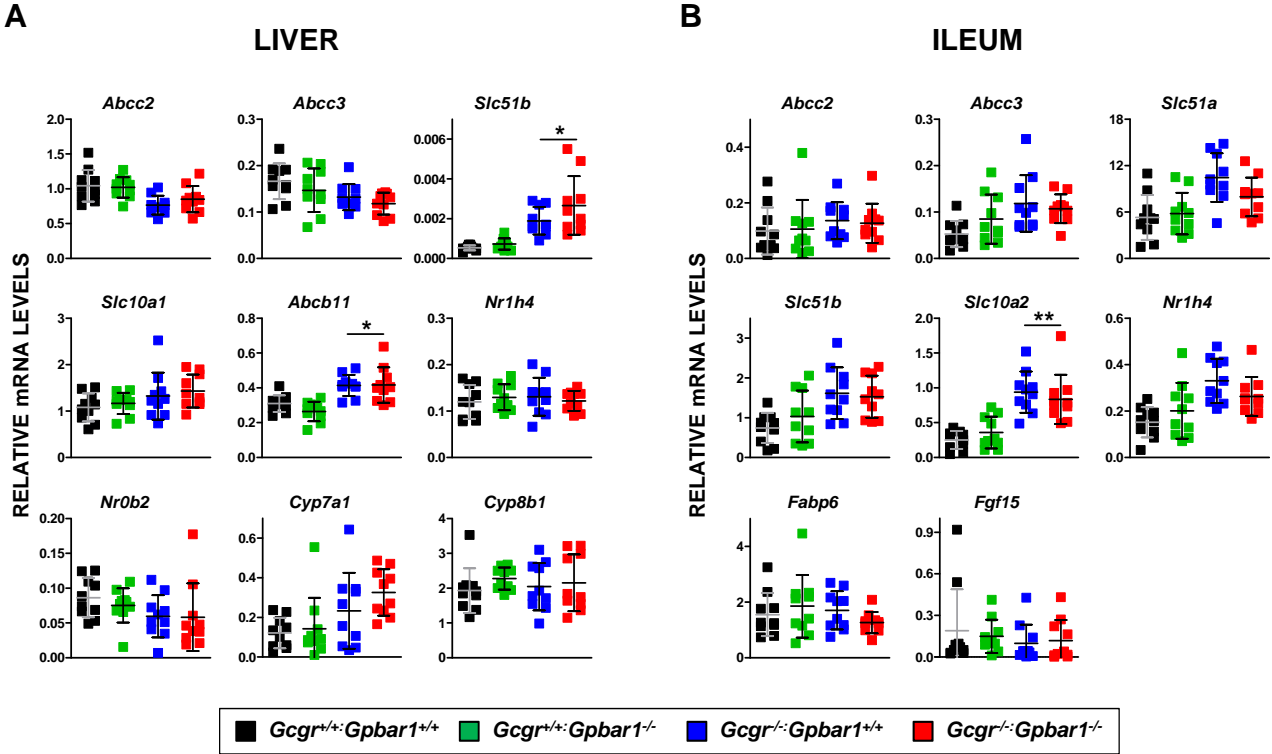

## Supplementary Table 1

### TaqMan Gene Expression Assays

| <u>Official gene symbol (alias)</u> | <u>TaqMan assay</u> |
|-------------------------------------|---------------------|
| <b><i>Sclt10a1</i></b> (Ntcp)       | Mm00441421_m1       |
| <b><i>Abcc2</i></b> (Mrp2)          | Mm00496899_m1       |
| <b><i>Abcc3</i></b> (Mrp3)          | Mm00551550_m1       |
| <b><i>Abcb11</i></b> (Bsep)         | Mm00445168_m1       |
| <b><i>Slc51b</i></b> (OstB)         | Mm01175040_m1       |
| <b><i>Nr1h4</i></b> (Fxr)           | Mm01240553_m1       |
| <b><i>Cyp7a1</i></b>                | Mm00484152_m1       |
| <b><i>Cyp8b1</i></b>                | Mm00501637_s1       |
| <b><i>Nr0b2</i></b> (Shp)           | Mm00442278_m1       |
| <b><i>Slc10a2</i></b> (Asbt)        | Mm00488258_m1       |
| <b><i>Fabp6</i></b>                 | Mm00434315_m1       |
| <b><i>Slc51a</i></b> (OstA)         | Mm00521530_m1       |
| <b><i>Fgf15</i></b>                 | Mm00433278_m1       |
| <b><i>PPiA</i></b>                  | Mm02342430_g1       |
| <b>rRNA 18S</b>                     | Hs99999901_s1       |
